# Supplementary material for: Allergenicity and Conformational Diversity of Allergens
Source: MDPI journal article supplement (doi:10.3390/allergies4010001), 2024-01-11
Supplement: s1 [file s1]

### Supplemental Information

**Table S1:** List of selected members of different allergen families with their origin, route of exposure, predicted linear epitopes using the AlgPred2.0 online tool and known conformational and linear B-cell epitopes determined using the IEDB.

| Family name    | Allergen Name | Origin       | Route of exposure | Predicted sequential epitopes                                                                                                                                                                                 | known conformational B cell epitopes                                                                                                                                                                                                                                                                                                        | known linear B Cell epitopes                                                                                                                                                                                                                                                                                                                                                                                                                                                                                                                            | # of known linear B Cell epitopes | # of known linear T Cell epitopes |
|----------------|---------------|--------------|-------------------|---------------------------------------------------------------------------------------------------------------------------------------------------------------------------------------------------------------|---------------------------------------------------------------------------------------------------------------------------------------------------------------------------------------------------------------------------------------------------------------------------------------------------------------------------------------------|---------------------------------------------------------------------------------------------------------------------------------------------------------------------------------------------------------------------------------------------------------------------------------------------------------------------------------------------------------------------------------------------------------------------------------------------------------------------------------------------------------------------------------------------------------|-----------------------------------|-----------------------------------|
| AllFam         |               |              |                   | AlgPred 2.0                                                                                                                                                                                                   | IEDB                                                                                                                                                                                                                                                                                                                                        | IEDB                                                                                                                                                                                                                                                                                                                                                                                                                                                                                                                                                    |                                   |                                   |
| Bet v 1 family | Bet v 1       | White birch  | Airway            | EQVKASKEMGETLLRAVESYLLA<br>EVDHTNFKYNYSVIEG<br>GFPFKYVKDRVD<br>INFPEGFPFK<br>KAEQVKASKEMGETLLRAVESYLLAHS DAYN<br>MGETLLRAVESYLL<br>NIEGNGGPGTIKK<br>RAVESYLLAHS DAY<br>SKEMGETLLRAVESYLLAHS D<br>TNFKYNYSVIEG | S113<br>E43, N44, I45, E46, G47, N48, G49, G50, P51, G52, T53, R71, D73, H77, I87, K98<br>N29, K33, E46, P109<br>Y6, K135, E43, E46, N79, K104, K124, D157<br>T11, F31, S57, S113, I114<br>E40, N41, I42, E43, G44, N45, G46, G47, P48, G49, T50, K53, R68, D70, H74, I84, K95<br>E7, T10, N29, F31, K56, K66, K116, K120, D126, K135, E139 | KAEQVKASKEMGETLLRAVESYLLAHS DAYN<br>ISFPEGFPFK<br>DGDNLFPKVA<br>DGG SILKISNKYHTKGDHEVKA EQVKASKE<br>GPGTIKKISFPEGFPFKYVKDRVDEV DHTN<br>ILDGDNLF PKVAPQAI<br>LFPKVAPQAISSVENIEGNGGPGTIKKISF<br>MGETLLRAVESYLL<br>MGVFN YETETTSVIP AARLFKAFI<br>SKEMGETLLRAVESYLLAHS D<br>VDHTNFKYNYSVIEGGPIGDTLEKISNEIK<br>EVDHTNFKYNYSVIEG<br>GGPIGDTLEKISNEIK<br>GPGTIKKISF<br>EQVKASKEMGETLLRAVESYLLA<br>GDNLF PKVAPQAIS<br>ISFPEGFPFKY<br>ISFPEGFPFKYVKD<br>INFPEGFPFK<br>ISFPEGIPFK<br>ITFPEGSPFK<br>FILDGDNLF PKVAPQAISVE<br>NIEGNGGPGTIKK<br>ISSV<br>SSVE<br>SVEN | 26                                | 197                               |
| Bet v 1 family | Mal d 1       | Apple        | Food              | IDEA                                                                                                                                                                                                          | S112<br>N8, E9, F10, T11, S12, E13, I14, D28, N29, L30, I31, P32, K33, I34, K55, K56, I57, T58, F59, G60, E61, T122, K123, G124, N125, I126, E127, I128<br>T11, I31, T58, T113, I114                                                                                                                                                        | -                                                                                                                                                                                                                                                                                                                                                                                                                                                                                                                                                       | 0                                 | 48                                |
| Bet v 1 family | Api g 1       | Celery       | Food              | LPKAAPGA                                                                                                                                                                                                      | no published epitopes                                                                                                                                                                                                                                                                                                                       | LGFIESIENH<br>VVPEENIKYAN                                                                                                                                                                                                                                                                                                                                                                                                                                                                                                                               | 2                                 | 14                                |
| Bet v 1 family | Pru av 1      | Sweet cherry | Food              | no epitopes found                                                                                                                                                                                             | N29                                                                                                                                                                                                                                                                                                                                         | -                                                                                                                                                                                                                                                                                                                                                                                                                                                                                                                                                       | 0                                 | 1                                 |

|                |          |                  |         |                                                                                                          |                       |                                                                                                                    |    |     |
|----------------|----------|------------------|---------|----------------------------------------------------------------------------------------------------------|-----------------------|--------------------------------------------------------------------------------------------------------------------|----|-----|
|                |          |                  |         |                                                                                                          | S113<br>E46           |                                                                                                                    |    |     |
| Bet v 1 family | Ara h 8  | Peanut           | Food    | IDEA                                                                                                     | no published epitopes | NAMKDADSITPKIIDDVKSV<br>NYSVVGGVALPPTAEKITFE                                                                       | 2  | 0   |
| Bet v 1 family | Aln g 1  | Alder            | Airway  | ITFPEGSPFK<br>NIEGNNGPGTIKK<br>SVIPAARLFKAF                                                              | no published epitopes | -                                                                                                                  | 0  | 48  |
| Profilin       | Ara h 5  | Peanut           | Food    | DGSVWAQS<br>GDYLID<br>IKKTNQALIIG<br>KTNQALIIGI<br>TPGQCN<br>TPGQCNMIVE                                  | no published epitopes | MNDFAEPGSLAPTGL<br>APTGLYLGGTKYMMVIQGEPPG<br>GVTIEKTNQALIIGIYDKPM<br>GVWAQSSHFPPQFKPEEITAI<br>LIIGIYDKPMTPGQCNMIVE | 5  | 0   |
| Profilin       | Hev b 8  | Latex            | Contact | AAIIGQD<br>DGSVWAQS<br>GDYLID<br>IDQGY<br>KTNQALIIGI<br>MSWQAYVDDH<br>NMIVERLGDY<br>TPGQCN<br>TPGQCNMIVE | antigen not found     | - - -                                                                                                              | -  | -   |
| Profilin       | Ara t 8  | Mouse-ear cress  | Airway  | DGSVWAQS<br>IQGEQGAVIRG<br>TAAAILGQDG                                                                    | antigen not found     | - - -                                                                                                              | -  | -   |
| Profilin       | Amb a 8  | Short ragweed    | Airway  | MSWQAYVDDH<br>TPGQCN<br>VERPGDYL                                                                         | no published epitopes | -                                                                                                                  | 0  | 9   |
| Profilin       | Art v 4  | Mugwort          | Airway  | KYMVIQGEAG<br>QGEAGAVIRG<br>YVDDHLMCDI                                                                   | no published epitopes | -                                                                                                                  | 0  | 0   |
| Profilin       | Tri a 12 | Wheat            | Food    | APTGLFLGGT<br>FLGGTKYMMVI<br>GDYLID<br>IDQGY<br>TPGQCN                                                   | antigen not found     | - - -                                                                                                              | -  | -   |
| Lipocalin      | Bla g 4  | German Cockroach | Airway  | LDQVNQHKKAIEDLKHFNLYEDLHSTCH<br>SVRRFHPKLGDK                                                             | antigen not found     | - - -                                                                                                              | -  | -   |
| Lipocalin      | Fel d 7  | Domestic cat     | Airway  | no epitopes found                                                                                        | no published epitopes | -                                                                                                                  | 0  | 0   |
| Lipocalin      | Mus m 1  | House mouse      | Airway  | no epitopes found                                                                                        | no published epitopes | -                                                                                                                  | 0  | 106 |
| Lipocalin      | Blo t 13 | Storage mite     | Airway  | no epitopes found                                                                                        | no published epitopes | ASVGDVTSVRTYKRI<br>DVVVVASVGDVTSVRTYKR<br>EVDVQGDYVFRSLSTFKNT<br>GEEFEEDRADGKRVTVVNK<br>IQTQYGDKEVKIVRDFQGGDD      | 21 | 0   |

|                                    |            |              |         |                                                                                                                                                                      |                       |                                                                                                                                                                                                                                                                                                                                               |   |    |  |
|------------------------------------|------------|--------------|---------|----------------------------------------------------------------------------------------------------------------------------------------------------------------------|-----------------------|-----------------------------------------------------------------------------------------------------------------------------------------------------------------------------------------------------------------------------------------------------------------------------------------------------------------------------------------------|---|----|--|
|                                    |            |              |         |                                                                                                                                                                      |                       | LSTFKNTEIKFKLGEEFEED<br>MPIEGKYKLEKSDNFDKFLD<br>MVKTAAKTLKPTLEVDVQGD<br>NFDKFLDELGVGFMVKTAAK<br>RDFQGDDVVVTASVGDVTSV<br>STFKNTEIKFKLGEEFEED<br>VKTVVNKEGDNKFIQTQYG<br>EIKFKLGEEFEEDRA<br>FKLGEEFEEDRADGK<br>IEGKYKLEKSDNFDK<br>KNTEIKFKLGEEFEE<br>KYKLEKSDNFDKFLD<br>LEKSDNFDKFLDELG<br>QTQYGDKEVKIVRDF<br>SDNFDKFLDELGVGF<br>YGDKEVKIVRDFQGD |   |    |  |
| Lipocalin                          | Can f 2    | Domestic dog | Airway  | no epitopes found                                                                                                                                                    | no published epitopes | -                                                                                                                                                                                                                                                                                                                                             | 0 | 0  |  |
| Plant defensin                     | Art v 1    | Mugwort      | Airway  | no epitopes found                                                                                                                                                    | no published epitopes | -                                                                                                                                                                                                                                                                                                                                             | 0 | 21 |  |
| Class I chitinase                  | Pers a 1   | Avocado      | Food    | AEQCGRQAGG                                                                                                                                                           | antigen not found     | -                                                                                                                                                                                                                                                                                                                                             | - | -  |  |
| Beta-1,3-glucana                   | Mus a 5    | Banana       | Food    | GLFYPNKQP<br>IRRNVVAYWPSVSFR<br>MRNIYNALSSAG<br>NLIRHVGGGTPR<br>NNIARMRLYDPNQAA<br>QNFGLFYPNKQPVYQ<br>SAAGDWIRRNVVAYW<br>SEVVSLYKSNNIARMRLYDPNQAA<br>YNQNLIRHVGGGTPR | no published epitopes | GLFYPNKQP<br>IRRNVVAYWPSVSFR<br>MRNIYNALSSAG<br>NLIRHVGGGTPR<br>NNIARMRLYDPNQAA<br>QNFGLFYPNKQPVYQ<br>SAAGDWIRRNVVAYW<br>SEVVSLYKSNNIARMRLYDPNQAA<br>YNQNLIRHVGGGTPR                                                                                                                                                                          | 9 | 0  |  |
| Acidic protein                     | Hev b 5    | Latex        | Contact | 108 epitopes predicted                                                                                                                                               | antigen not found     | -                                                                                                                                                                                                                                                                                                                                             | - | -  |  |
| Havein-like and class I/II chinase | Hev b 6.02 | Latex        | Contact | 108 epitopes predicted                                                                                                                                               | antigen not found     | -                                                                                                                                                                                                                                                                                                                                             | - | -  |  |
